# Supplementary material for: Research on Flesh Texture and Quality Traits upon Kiwifruit (cv. Xuxiang) at Fluctuating Temperatures during Cold Storage
Source: Preprints.org preprint supplement (doi:10.20944/preprints202308.1590.v1), 2023-08-22
Supplement: Supplementary file 3 [file supplementary]

## Sheet: Sheet1
	Gene name	Direction	Primer sequence (5’-3’)
	Pbactin	Forward	CCAAGGCCAACAGAGAGAAG
		Reverse	GACGGAGGATAGCATGAGGA
	Pbβ-Gal	Forward	CATGCGGTATGACCTGCCT
		Reverse	CAGCCGAGACAG TTTCTTCATT
	PbPG	Forward	CACCACAATGCACGACACTTT
		Reverse	CGTTCTGGCATTTGTTTCCGT
	PbPME	Forward	GATTGAGAGCGAGATCGGAGATT
		Reverse	CGAGGAGAATGGAAGCAGTGTAT
